# Supplementary material for: Novel Algorithm of Network Calcium Dynamics Analysis for Studying the Role of Astrocytes in Neuronal Activity in Alzheimer’s Disease Models
Source: MDPI journal article supplement (doi:10.3390/ijms232415928), 2022-12-14
Supplement: s1 [file s1]

## Supplementary 1

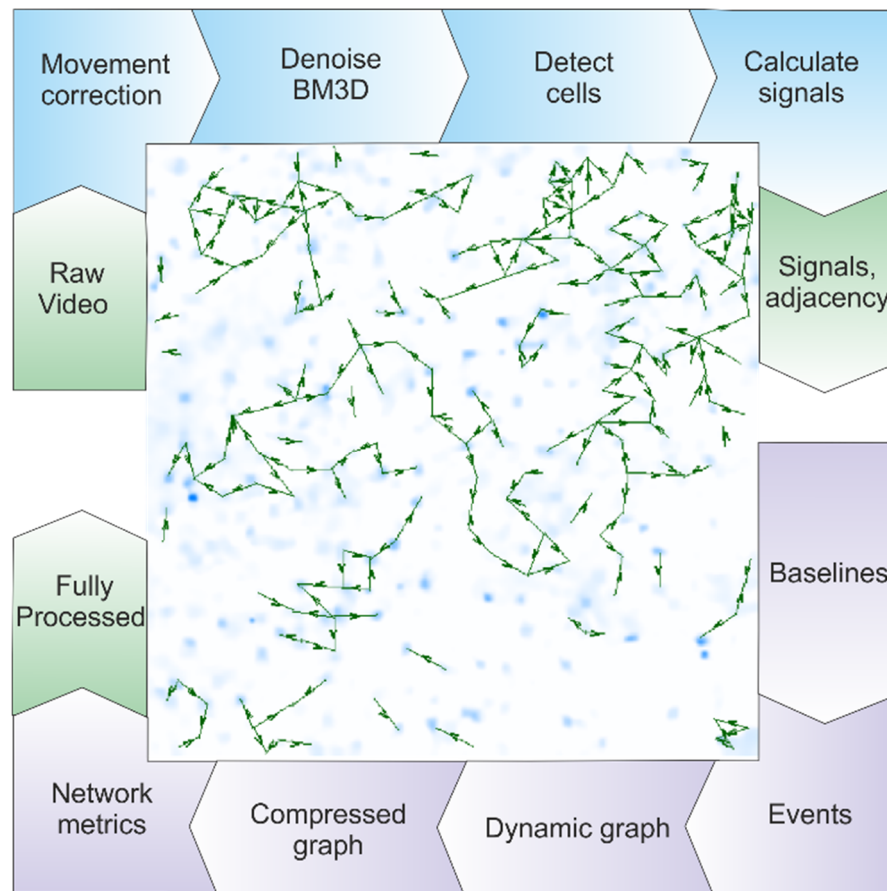

**Supplementary Figure S1.** The developed algorithm pipeline: the signal preprocessing (upper blue blocks) and event based network reconstruction (bottom purple block).

**A**

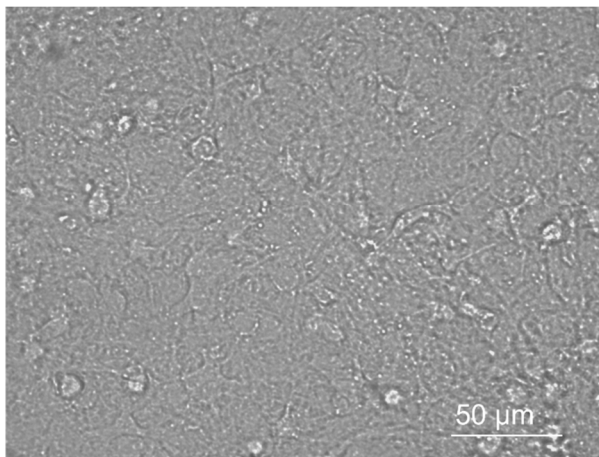

**B**

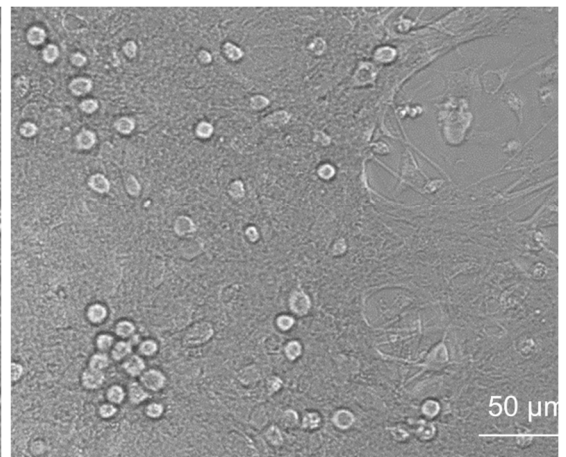

**Supplementary figure S2. A -** Morphology of primary astrocyte cultures on 35 DIV, representative wide-field light microscopy image. **B -** Morphology of co-cultivated hippocampal neurons and cortical astrocyte on 35 DIV (14 day of cocultivation), representative wide-field light microscopy image. Scale bars – 50  $\mu\text{m}$ .
