# Supplementary material for: Novel Algorithm of Network Calcium Dynamics Analysis for Studying the Role of Astrocytes in Neuronal Activity in Alzheimer’s Disease Models
Source: Int J Mol Sci. 2022 Dec 14;23(24):15928. doi: 10.3390/ijms232415928 (PMC9781291; doi:10.3390/ijms232415928)
Supplement: Supplementary file 1 [file ijms-23-15928-s001.zip]

Archive with 5 entries (5 files):
- Supplement Video S1 Calcium activity of neuronal culture ZOOM.mp4
- Supplement Video S2 Calcium activity of astrocytic culture.avi
- Supplementary_1.pdf
- Supplementary_video S3_dynamic_graph_of_neuronal_culture.mp4
- Supplementary_video S4_dynamic graph_of_astrocytic_culture.mp4
